# Supplementary material for: Sedeveria pink ruby Extract-Mediated Synthesis of Gold and Silver Nanoparticles and Their Bioactivity against Livestock Pathogens and in Different Cell Lines
Source: MDPI journal article supplement (doi:10.3390/antibiotics12030507), 2023-03-03
Supplement: s1 [file s1]

## Supplementary information

# *Sedeveria pink ruby* Extract-Mediated Synthesis of Gold and Silver Nanoparticles and Their Bioactivity against Livestock Pathogens and in Different Cell Lines

Palaniselvam Kuppusamy <sup>1</sup>, Sujung Kim <sup>1</sup>, Sung-Jo Kim <sup>2</sup>, Myunghum Park <sup>3,\*</sup> and Ki-Duk Song <sup>1,\*</sup>

<sup>1</sup> Department of Agricultural Convergence Technology, Jeonbuk National University, Jeonju 54896, Republic of Korea; kpalaselvam@jbnu.ac.kr (P.K.); feelksj00@naver.com (S.K.)

<sup>2</sup> Division of Cosmetics and Biotechnology, College of Life and Health Sciences, Hoseo University, Asan 31499, Republic of Korea; [sungjo@hoseo.edu](mailto:sungjo@hoseo.edu)

<sup>3</sup> Research and Development Center, T&T Research, Anyang 14059, Republic of Korea

\* Correspondence: [pmh@tntresearch.co.kr](mailto:pmh@tntresearch.co.kr) ([M.P.](#)); [kiduk.song@jbnu.ac.kr](mailto:kiduk.song@jbnu.ac.kr) (K.-D.S.); Tel.: +82-31-689-3610 ([M.H.P.](#)); +82-63-219-5523 (K.-D.S.)

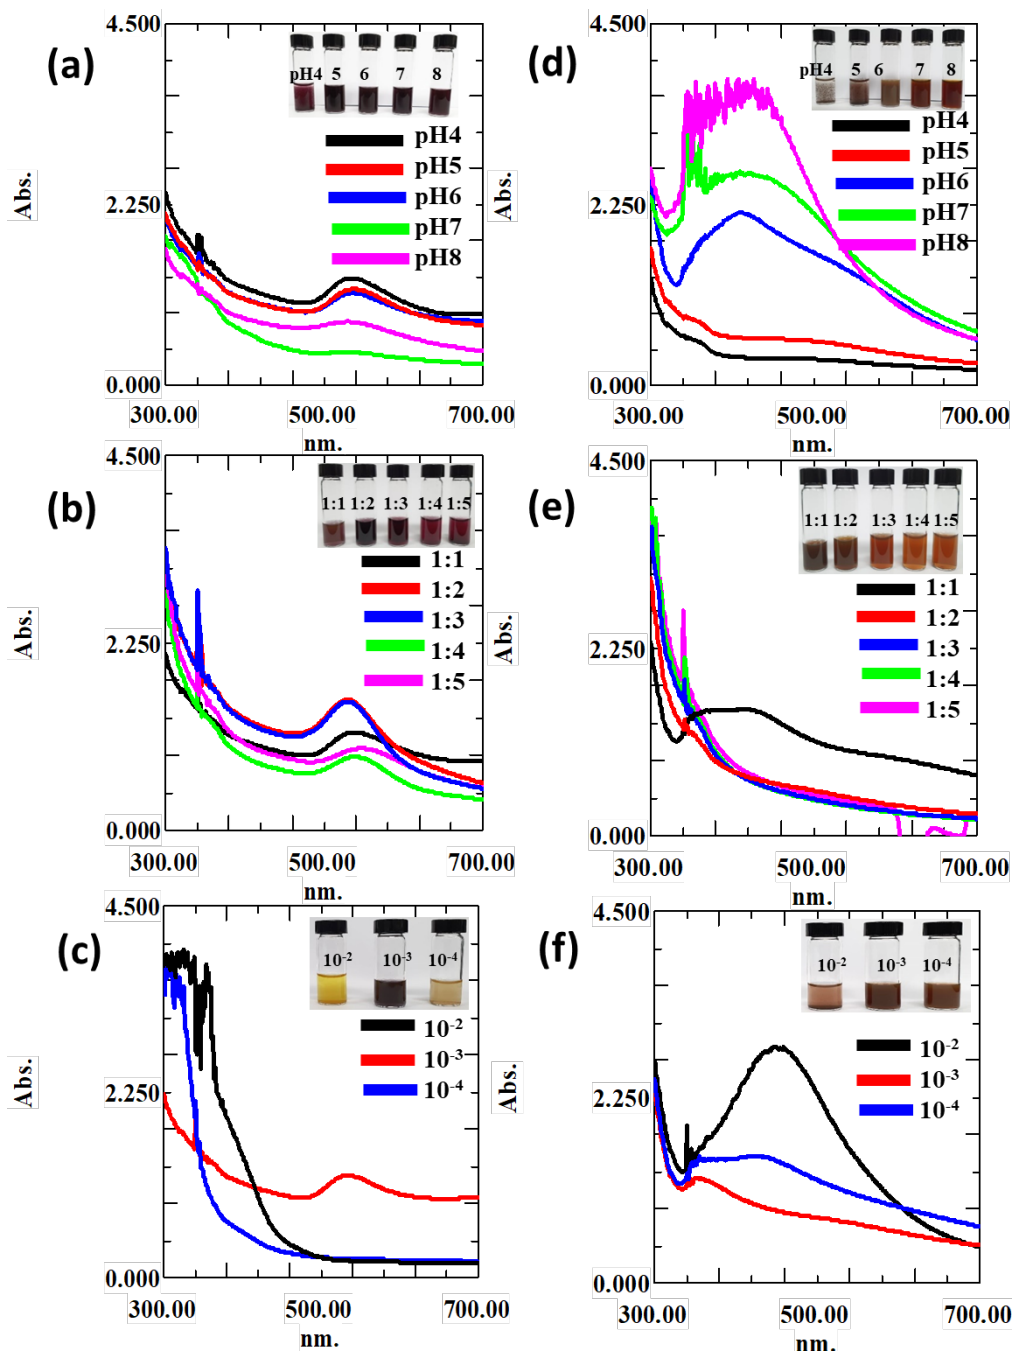

**Figure S1.** UV-vis absorbance spectra of biosynthesized SP-AuNPs and SP-AgNPs were optimized with different reaction parameters (pH, plant extract ratio and metal salt concentration). (a-c) UV-vis spectra of SP-AuNPs with different optimized ranges of pH, plant extract and metal salt concentration. (d-f) UV-vis spectra for SP-AgNPs prepared with different optimized ranges of pH, plant extract and metal ion concentration for 24 h.

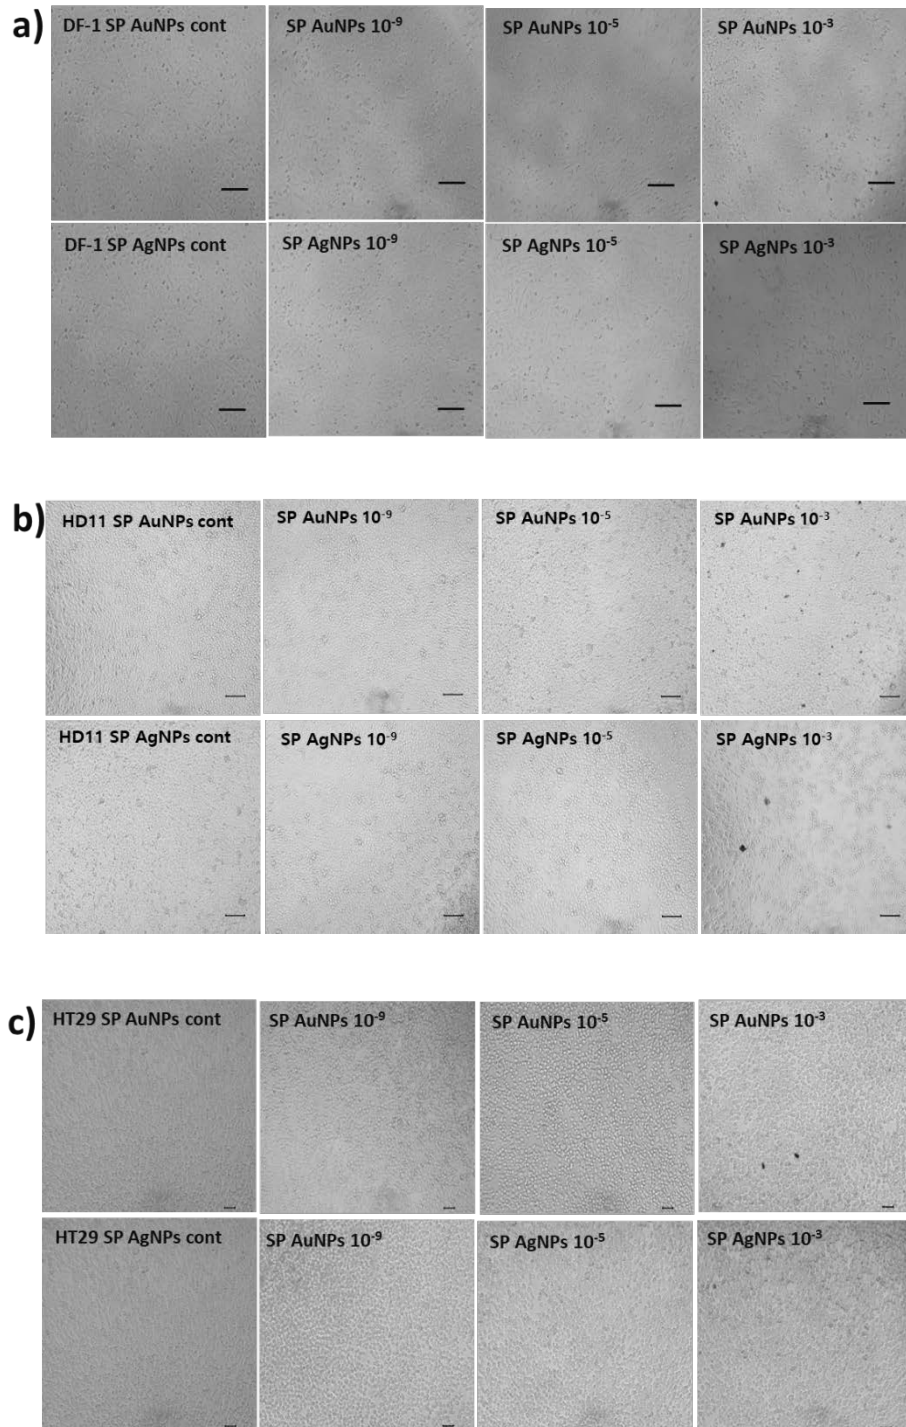

**Figure S2.** Cells was treated with different concentration of SP-AuNPs and SP-AgNPs ( $10^{-1}$  to  $10^{-9}$  dilution) for 24 h. Morphological changes were observed in the nanoparticles treated and control cells by using light microscope (scale bar = x100). **(a)** DF-1 cells **(b)** HD11 cells and **(c)** HT-29 cells.

**Table S1:** MIC of *S.pink ruby* biosynthesized SP-AuNPs and SP-AgNPs against selected pathogenic microorganisms.

| Pathogens                          | MIC ( $\mu\text{g.ml}^{-1}$ ) |          |          |
|------------------------------------|-------------------------------|----------|----------|
|                                    | SP-AuNPs                      | SP-AgNPs | Control* |
| <i>Salmonella typhi</i>            | 0.102                         | 0.102    | 0.347    |
| <i>Salmonella enteritidis</i>      | -                             | 0.102    | 0.347    |
| <i>Salmonella derby</i>            | 0.102                         | 0.102    | 0.347    |
| <i>E. coli</i>                     | 0.102                         | 0.102    | 0.039    |
| <i>Yersinia enterocolitica</i>     | 0.102                         | 0.102    | NA       |
| <i>Yersinia pseudotuberculosis</i> | 0.076                         | 0.050    | NA       |
| <i>Clostridium difficile</i>       | 0.050                         | -        | 0.019    |
| <i>Candida albicans</i>            | 0.102                         | -        | 0.156    |
| <i>Candida tropicalis</i>          | 0.102                         | -        | 0.156    |
| <i>Candida glabrata</i>            | -                             | -        | 0.156    |

\*Ampicillin was used as standard antibiotic, - No activity.
